# Supplementary material
Source: publisher site journal article supplement (https://static.cambridge.org/content/id/urn:cambridge.org:id:article:S0890037X19001167/resource/name/S0890037X19001167supp001.docx)
Supplement: Supplementary file 1 [file S0890037X19001167supp001.docx]

Supplemental information.

Supplementary Table 1. Average horseweed density (SE) at each sampling time in each year.

| CCa | FH | SH | 2016–2017 | | | 2017–2018 | | |
| --- | --- | --- | --- | --- | --- | --- | --- | --- |
|  |  |  | T1b | T2 | T3 | T1b | T2 | T3 |
|  |  | Horseweed density | | | | | |
| m−2 | | | | | |
| No CC | No FH | No SH | 1,093b (256) | 172 (74) | 81 (13) | 201b (41) | 34 (9) | 121 (20) |
| No CC | No FH | 2,4-D | – | 5 (5) | 24 (4) | – | 14 (7) | 124 (17) |
| No CC | No FH | Dicamba | – | 5 (3) | 22 (6) | – | 7 (6) | 92 (15) |
| No CC | FH | No SH | 20b (6) | 21 (13) | 57 (11) | 0b (0) | 270 (69) | 294 (36) |
| No CC | FH | 2,4-D | – | 1 (1) | 43 (6) | – | 43 (18) | 190 (31) |
| No CC | FH | Dicamba | – | 4 (2) | 40 (14) | – | 21 (10) | 249 (28) |
| CC | no FH | No SH | 452b (112) | 27 (17) | 6 (3) | 113b (12) | 4 (2) | 133 (28) |
| CC | no FH | 2,4-D | – | 6 (6) | 4 (1) | – | 1 (1) | 99 (18) |
| CC | no FH | Dicamba | – | 0 (0) | 8 (3) | – | 1 (1) | 69 (17) |
| CC | FH | No SH | 8b (3) | 7 (5) | 2 (1) | 1.6b (2) | 4 (3) | 97 (19) |
| CC | FH | 2,4-D | – | 3 (1) | 7 (3) | – | 4 (4) | 76 (10) |
| CC | FH | Dicamba | – | 5 (5) | 7 (4) | – | 0 (0) | 138 (14) |

aAbbreviations: CC, cover crop; FH, fall herbicide; SH, spring herbicide; T1, approximately 4 wk after the cover crop planting and fall herbicide application; T2, 3 or 5 wk after the spring herbicide application; T3, 1 or 2 wk after soybean planting.

bThe spring herbicide had not yet been applied; thus, these values represent the average horseweed density across future spring herbicide treatments.
